# Supplementary material
Source: ML conference proceedings conference paper supplement (https://proceedings.neurips.cc/paper_files/paper/2019/hash/d594b1a945b5d645e59e21f88bd2d83b-Abstract.html)
Supplement: Supplementary file [file d594b1a945b5d645e59e21f88bd2d83b-Supplemental.zip]

---

# Neural Machine Translation with Soft Prototype (Supplementary Document)

---

Anonymous Author(s)

Affiliation

Address

email

## 1 A More Details of the Formulation

2  $F_C(q, K, V)$  consists of three inputs  $q, K, V$ , where  $q \in \mathbb{R}^d$ ,  $K = \{k_1, k_2, \dots, k_m\}$ ,  $V =$   
3  $\{v_1, v_2, \dots, v_m\}$ , and  $m$  is the size of the set  $K$  and  $V$ . For any  $i \in [m]$ ,  $k_i, v_i \in \mathbb{R}^d$ . Mathe-  
4 matically,

$$F_C(q, K, V) = \sum_{i=1}^m \alpha_i v_i; \alpha_i \propto \exp(W_q q + W_k k_i), \quad (1)$$

5 where  $\alpha_i \geq 0$ ,  $\sum_{i=1}^m \alpha_i = 1$ , and  $W$ 's are the parameters to be learned.  $F_S$  is the same as  $F_C$ , with  
6 different parameters  $W$ 's.

7 For any  $x \in \mathbb{R}^d$ ,

$$F_N(x) = \max(xW_1 + b_1, 0)W_2 + b_2, \quad (2)$$

8 where  $\max$  is an element-wise operator,  $W$ 's and  $b$ 's are the parameters to be learned.

## 9 B Empirical Analysis of Soft Prototype

### 10 B.1 Study on Parameter Reuse.

11 We study the influence of parameter reuse in our approach (i.e., the parameters of Enc and Net). On  
12 WMT2014 En→De, we compare the performances under two settings:

- 13 1. *Shared* setting with Enc = Net and one  $F_C$ ;
- 14 2. *Non-Share* setting with independent Enc and Net, and two separate  $F_C$ 's from Eqn.(4).

15 The BLEU scores of *Shared* and *Non-Share* settings are 29.46 and 29.45 respectively, which are  
16 almost identical. This indicates that the improvements of our approach are brought by the idea of soft  
17 prototype, instead of introducing more model parameters.

### 18 B.2 Study on Values of $\kappa$ .

19 We study the performances of our approach with respect to different values of  $\kappa$ . We build probabilistic  
20 generator  $g^\kappa$  with  $\kappa = \{1, 2, 3, 5, 10, 20\}$  on the WMT2014 En→De dataset, and train the models  
21 with different prototype.

22 As we can see from the results in Figure 1, the soft prototype works the best with relative small  
23 values for  $\kappa$  (e.g.  $\kappa \leq 10$ ), while the larger value like  $\kappa = 20$  hampers the model performance. Our  
24 conjecture is that large values for  $\kappa$  encourage better information converge than small values, yet  
25 bring in more noise into the model at the same time, which is deleterious for the model training.  
26 With  $\kappa$  set in a reasonable range, the model can benefit from adequate additional information with  
27 a tolerable level of noise. We use  $\kappa = 3$  in the rest of our experiments to best utilize the proposed  
28 approach with a minimal increase in storage and inference cost.

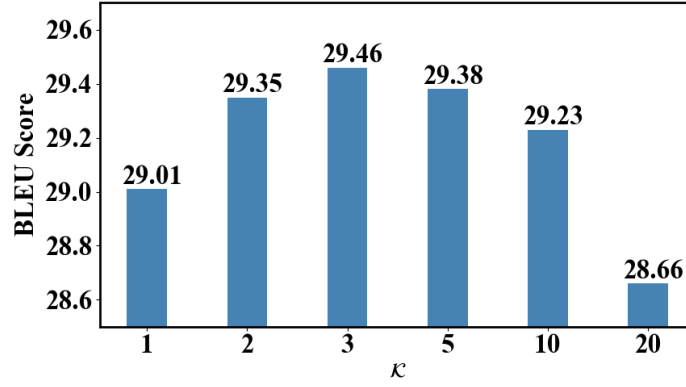

Figure 1: BLEU scores of WMT2014 En→De with different  $\kappa$ .

### 29 B.3 Study on Re-initializing Probability Generator $g$

30 After obtaining a better model, we reinitialize a generator  $g^\kappa$  with our best model on En→De (i.e.,  
 31 BLEU= 29.46), and achieve 0.14 BLEU improvement compared to the previous best model (i.e.,  
 32 BLEU= 29.60). This shows that a better  $g$  is helpful to improve performances.
